# Supplementary material
Source: MDPI journal article supplement (https://www.mdpi.com/2077-0472/13/5/1010)
Supplement: s1 [file s1]

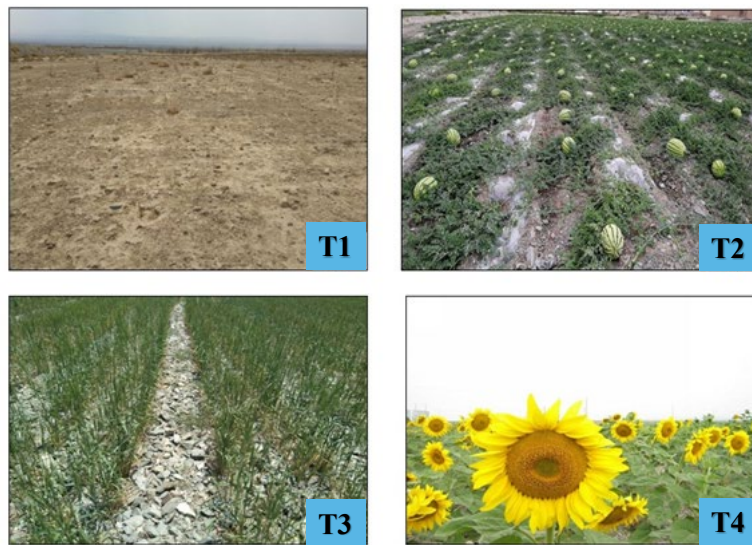

**Figure S1: Four different management fields**

(A) was treatment 1 (T1), grow watermelons for four years and then leave them fallow for three years

(B) was treatment 2 (T2), grow watermelons for seven years.

(C) was treatment 3 (T3), grow watermelons for six years and wheat for one year.

(D) was treatment 4 (T4), grow one year watermelon and one sunflower crop rotate,  $n=9$ .

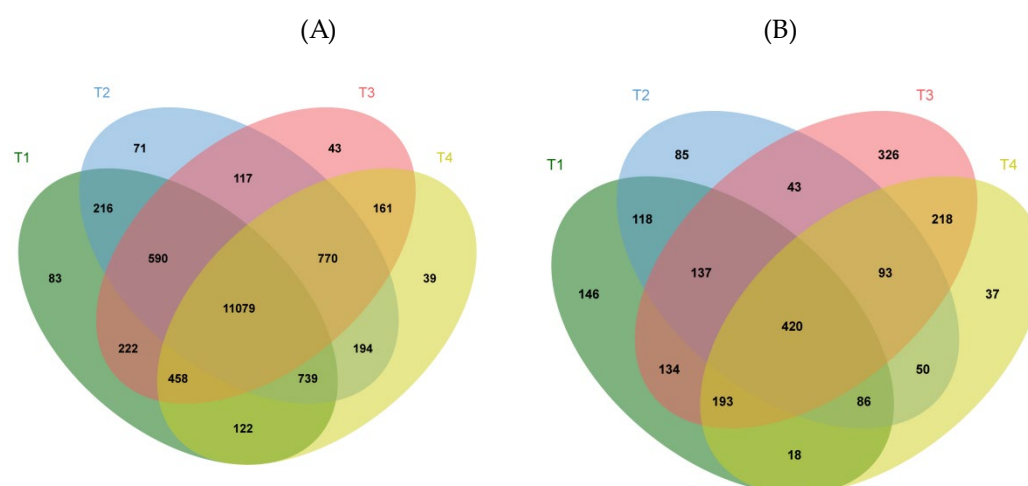

**Figure S2. Venn diagram of soil bacterial (A) and fungal (B) OTUs.**

Related to Figure 1A and B. (T1: grow watermelons for four years and then leave them fallow for three years, T2: grow watermelons for seven years, T3: grow watermelon for six years and wheat for one year, T4: one year watermelon and one sunflower crop rotate, n=9).

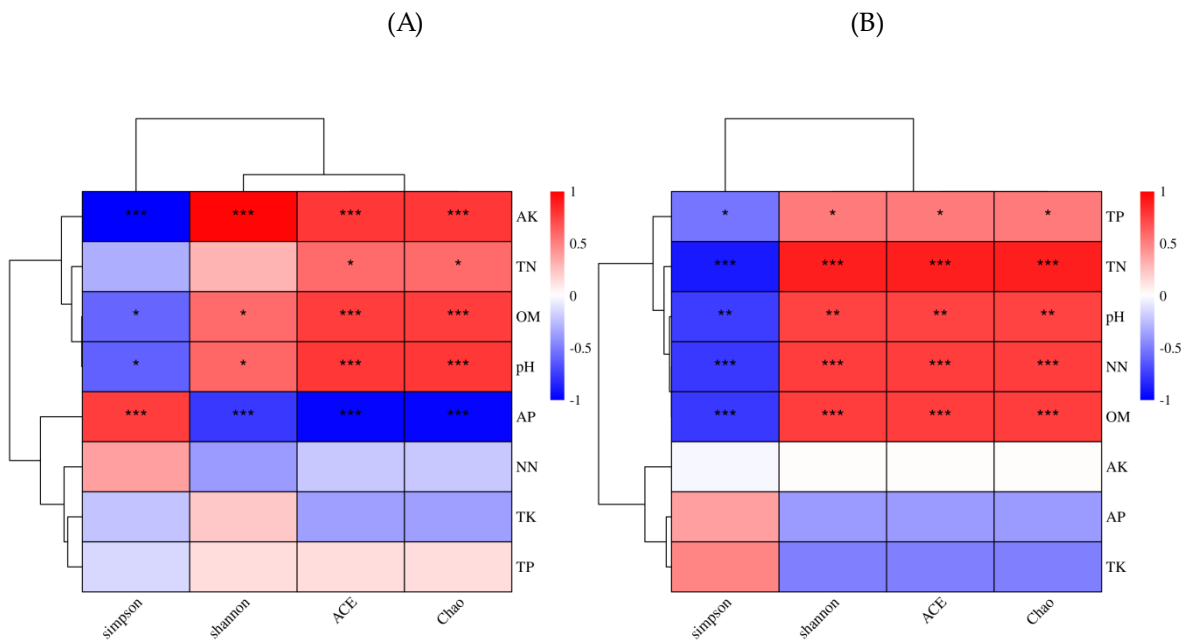

**Figure S3.** Spearman correlations of alpha diversity in soil bacterial (A) and fungal (B) community to soil attributes.

**Table S1. Soil bacterial and fungal community composition at the phylum level.** (T1: grow watermelons for four years and then leave them fallow for three years, T2: grow watermelons for seven years, T3: grow watermelon for six years and wheat for one year, T4: one year watermelon and one sunflower crop rotate, n=9).

| Kingdom  | Phylum            | Relative abundance % |                |                |                |        |              |
|----------|-------------------|----------------------|----------------|----------------|----------------|--------|--------------|
|          |                   | T1                   | T2             | T3             | T4             | F      | P            |
| Bacteria | Proteobacteria    | 0.102±0.0082b        | 0.189±0.0184a  | 0.154±0.0147a  | 0.181±0.00705a | 9.241  | <b>0.000</b> |
|          | Verrucomicrobia   | 0.0071±0.00091       | 0.0186±0.00674 | 0.0167±0.00248 | 0.0096±0.00111 | 2.265  | 0.100        |
|          | Planctomycetes    | 0.115±0.011          | 0.130±0.009    | 0.126±0.009    | 0.107±0.009    | 1.224  | 0.317        |
|          | Gemmatimonadetes  | 0.02±0.003a          | 0.01±0.001b    | 0.011±0.001b   | 0.011±0.001b   | 6.618  | <b>0.001</b> |
|          | Actinobacteria    | 0.261±0.015a         | 0.109±0.014b   | 0.126±0.009b   | 0.127±0.021b   | 21.750 | <b>0.000</b> |
|          | Euryarchaeota     | 0.004±0.002          | 0.002±0.000    | 0.005±0.003    | 0.002±0.001    | 0.654  | 0.586        |
|          | Bacteroidetes     | 0.009±0.002          | 0.011±0.003    | 0.009±0.001    | 0.008±0.001    | 0.558  | 0.647        |
|          | Acidobacteria     | 0.178±0.009b         | 0.206±0.011a   | 0.223±0.008a   | 0.224±0.008a   | 5.267  | <b>0.005</b> |
|          | Others            | 0.304±0.008          | 0.324±0.021    | 0.327±0.008    | 0.33±0.011     | 0.805  | 0.500        |
|          | Total             | 100%                 | 100%           | 100%           | 100%           |        |              |
| Fungi    | Mortierellomycota | 0.002±0.001          | 0.029±0.019    | 0.004±0.001    | 0.002±0.002    | 1.944  | 0.142        |
|          | Ascomycota        | 0.725±0.044a         | 0.427±0.121b   | 0.594±0.061ab  | 0.359±0.114b   | 3.259  | <b>0.034</b> |
|          | Glomeromycota     | 0.014±0.005          | 0.009±0.005    | 0.027±0.008    | 0.012±0.006    | 1.769  | 0.173        |
|          | Chytridiomycota   | 0.116±0.066          | 0.032±0.029    | 0.003±0.002    | 0.027±0.016    | 1.783  | 0.170        |
|          | Basidiomycota     | 0.012±0.004          | 0.046±0.023    | 0.073±0.024    | 0.032±0.012    | 2.140  | 0.115        |
|          | Others            | 0.131±0.032b         | 0.457±0.126a   | 0.3±0.058ab    | 0.567±0.126a   | 4.011  | <b>0.016</b> |
|          | Total             | 100%                 | 100%           | 100%           | 100%           |        |              |
